# Supplementary material for: Iminodisuccinic Acid Relieved Cadmium Stress in Rapeseed Leaf by Affecting Cadmium Distribution and Cadmium Chelation with Pectin
Source: Hindawi journal article supplement (doi:10.1155/2022/7747152), 2022-01-01
Supplement: f1 [file 7747152.f1.docx]

**Table S1** Comparisons of soil characteristics between the control (CK) and IDS treatment. Mean ± SD (n = 5). Different lowercase indicates significant difference between these two treatments at *P* < 0.05 level.

| Treatment | pH | Organic matter (g/kg) | Available  P (g/kg) | Available K (g/kg) | NO3- (mg/kg) | NH4+（mg/kg） | Exchangeable Cd (μg/g) |
| --- | --- | --- | --- | --- | --- | --- | --- |
| CK | 5.6±0.4b | 34.7±1.0a | 0.7±0.2a | 228.2±26.9a | 18.7±0.4a | 101.9±1.1b | 0.9±0.2a |
| IDS | 5.8±0.1a | 35.4±0.8a | 0.9±0.2a | 211.8±18.4a | 18.1±0.9a | 110.1±2.7a | 0.9±0.1a |
